# Supplementary material
Source: PubMed Central journal article supplement (PMC1480468)
Supplement: pnas_0603359103_2.pdf [file pnas_0603359103_2.pdf]

**Supporting table 1 Pharmacological properties of DOR-eGFP expressed in HEK293 cells**

|                                                                   | DOR        | <i>n</i> | DOR-eGFP   | <i>n</i> | <i>p</i> |
|-------------------------------------------------------------------|------------|----------|------------|----------|----------|
| <b>Opioid ligands affinities: K<sub>i</sub> (nM) <sup>a</sup></b> |            |          |            |          |          |
| Met-enkephalin                                                    | 9.5 ± 0.4  | 3        | 9.6 ± 1.6  | 3        | 0.95     |
| β-endorphin                                                       | 6.4 ± 1.2  | 3        | 5.3 ± 0.9  | 3        | 0.52     |
| Deltorphan II                                                     | 7.8 ± 0.7  | 3        | 7.6 ± 0.6  | 3        | 0.84     |
| DPDPE                                                             | 11.6 ± 0.4 | 3        | 10.3 ± 1.1 | 3        | 0.37     |
| SNC80                                                             | 2.8 ± 1.6  | 3        | 2.9 ± 1.0  | 3        | 0.96     |
| [ <sup>3</sup> H]-diprenorphin (K <sub>D</sub> )                  | 1.3 ± 0.1  | 5        | 0.9 ± 0.1  | 5        | 0.07     |
| Naltrindole                                                       | 0.2 ± 0.1  | 3        | 0.2 ± 0.1  | 4        | 0.54     |
| <b>Deltorphan II-induced G protein activation<sup>b</sup></b>     |            |          |            |          |          |
| EC <sub>50</sub> (nM)                                             | 1.5 ± 0.4  | 3        | 1.1 ± 0.5  | 3        | 0.57     |
| E <sub>max</sub> (% basal)                                        | 256 ± 11   | 3        | 223 ± 23   | 3        | 0.27     |
| <b>Deltorphan II-induced receptor down-regulation<sup>c</sup></b> |            |          |            |          |          |
| B <sub>max</sub> (% basal)                                        | 7.1 ± 1.2  | 3        | 12.2 ± 4.8 | 3        | 0.40     |

<sup>a</sup> Binding affinities were measured in competition experiments using [<sup>3</sup>H]-diprenorphin as the radioligand. <sup>b</sup> Activation of G proteins was quantified using the [<sup>35</sup>S]-GTPγS binding assay. Deltorphan II potency (EC<sub>50</sub>) and efficacy (E<sub>max</sub>) are shown. <sup>c</sup> For receptor down-regulation experiments, cells were treated with 1 μM of deltorphan II for 24 hours. The number of receptor (B<sub>max</sub>) was measured in treated and untreated cells (basal). Reported values are mean ± sem. *n* indicates the number of independent experiments performed. Student t-test was used to determine *p* values.
