# Supplementary material
Source: PubMed Central journal article supplement (PMC1480468)
Supplement: pnas_0603359103_3.pdf [file pnas_0603359103_3.pdf]

**Supporting table 2 Pharmacological characterization of DOR-eGFP mice**

|                                                                       | +/+            | n | +eGFP                        | n | eGFP/eGFP                     | n | p       |
|-----------------------------------------------------------------------|----------------|---|------------------------------|---|-------------------------------|---|---------|
| <b>Saturation experiment: [<sup>3</sup>H]-naltrindole<sup>a</sup></b> |                |   |                              |   |                               |   |         |
| K <sub>D</sub> (nM)                                                   | 0.16 ± 0.03    | 7 | 0.12 ± 0.01                  | 7 | 0.10 ± 0.02                   | 7 | 0.14    |
| Bmax (pmol/mg prot)                                                   | 0.16 ± 0.02    | 7 | 0.25 ± 0.02 <sup>***</sup>   | 7 | 0.32 ± 0.01 <sup>***</sup>    | 7 | < 0.001 |
| <b>Agonist-induced G proteins activation<sup>b</sup></b>              |                |   |                              |   |                               |   |         |
| <b>EC<sub>50</sub> (nM)</b>                                           |                |   |                              |   |                               |   |         |
| Met-enkephalin                                                        | 500.27 ± 44.37 | 4 | 425.32 ± 36.33               | 4 | 583.35 ± 61.43                | 4 | 0.12    |
| Deltorphan II                                                         | 47.51 ± 29.47  | 6 | 34.93 ± 12.24                | 7 | 18.18 ± 6.80                  | 8 | 0.47    |
| SNC80                                                                 | 122.14 ± 9.46  | 5 | 104.40 ± 4.05                | 6 | 122.83 ± 9.74                 | 6 | 0.27    |
| DAMGO                                                                 | 180.45 ± 13.82 | 4 | 175.75 ± 17.65               | 4 | 228.90 ± 10.84                | 4 | 0.05    |
| U50,488                                                               | 116.83 ± 29.06 | 3 | 133.55 ± 36.61               | 4 | 185.53 ± 66.11                | 3 | 0.59    |
| <b>E<sub>max</sub> (% basal)</b>                                      |                |   |                              |   |                               |   |         |
| Met-enkephalin                                                        | 285.47 ± 17.22 | 4 | 307.35 ± 6.29                | 4 | 331.27 ± 13.81                | 4 | 0.10    |
| Deltorphan II                                                         | 115.40 ± 2.89  | 8 | 122.75 ± 2.79 <sup>*</sup>   | 8 | 138.50 ± 5.35 <sup>**</sup>   | 8 | < 0.01  |
| SNC80                                                                 | 152.18 ± 5.28  | 5 | 203.18 ± 3.11 <sup>***</sup> | 6 | 269.77 ± 10.75 <sup>***</sup> | 6 | < 0.001 |
| DAMGO                                                                 | 251.05 ± 24.9  | 4 | 242.90 ± 16.48               | 4 | 242.63 ± 16.96                | 4 | 0.94    |
| U50,488                                                               | 134.86 ± 6.30  | 4 | 127.96 ± 2.21                | 4 | 133.02 ± 4.28                 | 4 | 0.56    |

<sup>a</sup>Affinity of [<sup>3</sup>H]-naltrindole (K<sub>D</sub>) and number of sites (Bmax) are shown. <sup>b</sup>G proteins activation was quantified using the [<sup>35</sup>S]-GTP<sub>γ</sub>S binding assay. Potencies (EC<sub>50</sub>) and efficacies (E<sub>max</sub>) are shown. Reported values are mean ± sem. n indicates the number of independent experiments. One-way ANOVA was used to analyze the effect of the genotype (p values). For p values < 0.05, Bonferroni post-hoc test was used to compare heterozygous and homozygous mutant mice to wild-type mice (\* p < 0.05, \*\* p < 0.01, \*\*\* p < 0.001).
