# Supplementary material
Source: PubMed Central journal article supplement (PMC1480468)

P0

P5

P10

P15

Cpu

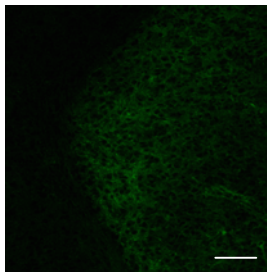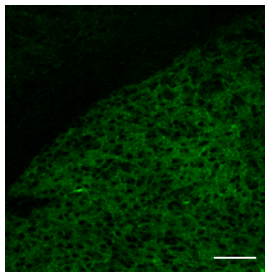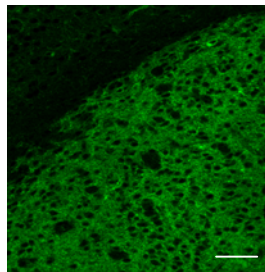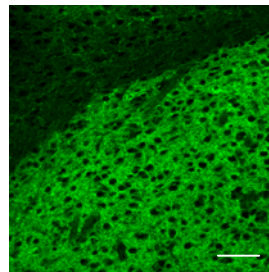

Hip

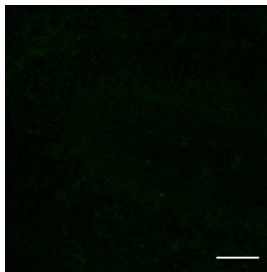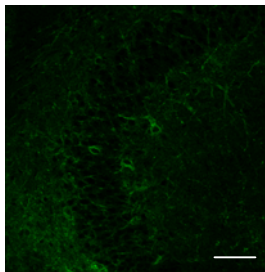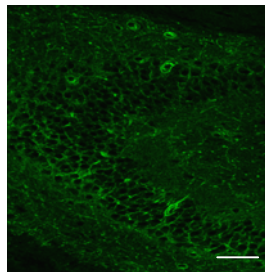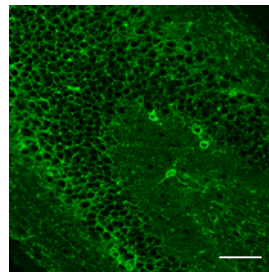

Supplement: pnas_0603359103_1.pdf [file pnas_0603359103_1.pdf]
